# Supplementary figures and images for: Green electrochemical synthesis of CeO2 nanopowders via an electrolysis–calcination process
Source: Royal Society of Chemistry journal article supplement (doi:10.1039/d5gc01320h), 2025-01-01

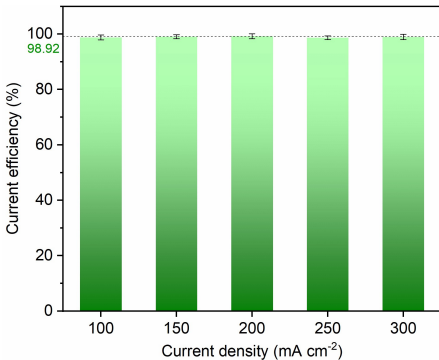

Supplement: d5gc01320h8.pdf [file d5gc01320h8.pdf]
